# Supplementary material for: Field measurements of trace gases and aerosols emitted by peat fires inCentral Kalimantan, Indonesia, during the 2015 El Niño
Source: Copernicus journal article supplement (doi:10.5194/acp-16-11711-2016), 2016-09-21
Supplement: Supplementary file 1 [file acp-16-11711-2016-supplement.zip]

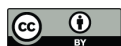

*Supplement of*

**Field measurements of trace gases and aerosols emitted by peat fires in Central Kalimantan, Indonesia, during the 2015 El Niño**

Chelsea E. Stockwell et al.

*Correspondence to:* Robert J. Yokelson (bob.yokelson@umontana.edu)

- [acp-16-11711-2016-supplement-title-page.pdf](#)
- [acp-2016-411-sp.xlsx](#)

The copyright of individual parts of the supplement might differ from the CC-BY 3.0 licence.
