# Supplementary material for: Field measurements of trace gases and aerosols emitted by peat fires inCentral Kalimantan, Indonesia, during the 2015 El Niño
Source: Copernicus journal article supplement (doi:10.5194/acp-16-11711-2016), 2016-09-21
Supplement: Supplementary file 1 [file acp-2016-411-sp.xlsx]

## Sheet: Table S1-Site Data
Table S1. Site data for peat fire sampling. Blank cells indicate that information is not available or applicable.
											Weather (may not match sampling time)
Site	Plume	Date (2015)	Approx time range	Location	Peat types	Inclusions burning?	depth of burn (approx site avg)	surface fuels present?	surface fuels	surface fuels	Temp	RH	Wind	Site notes
No.	letter	DD-mon	local	deg, min, sec			cm		loading (l>h)	burning/burnt?	C	%
1		2016-10-31	16:22-16:30	2o 26’ 46” S, 114o 10’ 12” E			40	unknown	unknown	consumed
1	A	2016-11-01	13:28-14:38	2o 26’ 46” S, 114o 10’ 12” E	Hemic	wood fragments	40	unknown	unknown	consumed	33	64	light, variable, southerly	Downward spreading in hemic peat - with wood fragments and buried logs/stumps nearby
1	B	2015-11-01	15:13-15:43	2o 26’ 46” S, 114o 10’ 12” E	Hemic & Fibric	wood fragments	31	ferns	unknown	burnt/charred remains	33	64	light, variable, southerly	Lateral spreading in compact hemic peat with wood fragments and fibrous fern root intrusions.
1	C	2015-11-01	15:47-15:58	2o 26’ 46” S, 114o 10’ 12” E	Hemic	wood fragments	62	unknown	unknown	consumed	33	64	light, variable, southerly	Downward spreading in hemic peat - with wood fragments and buried logs/stumps nearby
1	D	2015-11-01	16:01-16:15	2o 26’ 46” S, 114o 10’ 12” E	Hemic	wood fragments	52	unknown	unknown	consumed	33	64	light, variable, southerly	Downward spreading in hemic peat - with wood fragments and buried logs/stumps nearby
2	E	2015-11-02	10:33-11:31	2o26’28” S, 114o10’36” E	Fibric & Hemic	fibrous roots & wood fragments	28	ferns	high mass of light fuels	burnt/charred remains	33	64	light, variable, southerly	Lateral spreading fibrous peat, burning at rootmat- hemic peat boundary
2	F	2015-11-02	13:19-14:20	2o26’28” S, 114o10’35” E	Fibric & Hemic	fibrous roots & rotten wood fragments	21	ferns	high mass of light fuels	burnt/charred remains	34	54	light, variable, southerly	Lateral spreading fibrous peat, burning at rootmat-hemic peat boundary
2	G	2015-11-02	14:46-15:05	2o26’27” S, 114o10’34” E	Fibric & Hemic	fibrous roots & rotten wood fragments. Burnout exposed logging slash	28	ferns	high mass of light fuels	burnt/charred remains	33	60	light, variable, southerly	Lateral spreading fibrous peat, burning at rootmat-hemic peat boundary
2	H	2015-11-02	15:06-15:31	2o26’27” S, 114o10’34” E	Fibric & Hemic	fibrous roots & rotten wood fragments	18	ferns	high mass of light fuels	burnt/charred remains	33	52	light, variable, southerly	Lateral spreading fibrous peat, burning at rootmat-hemic peat boundary
3	I	2015-11-03	12:09-13:11	2o 11’52” S, 113o 50’40” E	Fibric & Hemic	fibrous roots & wood fragments	52	ferns	moderate mass of light fuels	burnt/charred remains	34	47	light, variable, southerly	Lateral spreading in compact hemic peat with wood fragments and fibrous fern root intrusions. Top ~18 cm fibric
3	J	2015-11-03	13:13-14:14	2o 11’52” S, 113o 50’40” E	Fibric & Hemic	fibrous roots $ rotten wood fragments	42	ferns	moderate mass of light fuels	green, scorched, & charred	34	47	light, variable, southerly	Lateral spreading in compact hemic peat with wood fragments and fibrous fern root intrusions. Top ~18 cm fibric
3	K	2015-11-03	14:15-14:40	2o 11’52” S, 113o 50’40” E	Fibric & Hemic	fibrous roots&rotten wood fragments	33	ferns	moderate mass of light fuels	green, scorched, & charred	34	47	light, variable, southerly	Lateral spreading in compact hemic peat with wood fragments and fibrous fern root intrusions. Top ~18 cm fibric
3	L	2015-11-03	15:09-15:36	2o 11’52” S, 113o 50’40” E	Fibric & Hemic	fibrous roots & rotten wood fragments	48	ferns	moderate mass of light fuels	green, scorched, & charred	34	47	light, variable, southerly	Lateral spreading in compact hemic peat with wood fragments and fibrous fern root intrusions. Top ~18 cm fibric. Undercut lense 30-60 cm deep.
4	M	2015-11-04	11:11-12:07	2o 15’ 34” S, 113o 52’ 44”E	Hemic & Sapric	fibrous roots & rotten wood fragments, burning under log	NA	ferns & grasses	light mass of light fuels	green, scorched, & charred	36	55	light, variable, southeasterly	Lateral spreading sapric-hemic peat with fern fine roots. Peat burning (tunnelling) under large stump deposited during canal building.
4	N	2015-11-04	12:08-12:32	2o 15’ 34” S, 113o 52’ 44”E	Fibric & Hemic	fibrous roots & rotten wood fragments	21	ferns & grasses	light mass of light fuels	green, scorched, & charred	36	53	light, variable, southeasterly	Lateral spreading fibrous peat, burning at rootmat- hemic peat boundary
4	O	2015-11-04	12:38-13:36	2o 15’ 34” S, 113o 52’ 44”E	Fibric & Hemic	fibrous roots & rotten wood fragments	22	ferns & grasses	light mass of light fuels	green, scorched, & charred	37	46	light, variable, southeasterly	Lateral spreading fibrous peat, burning at rootmat- hemic peat boundary
5	P	2015-11-04	14:53-15:21	2o26’38”S, 113o55’6”E	Fibric & Hemic	fibrous roots & rotten wood fragments	25	ferns, foliage from secondary forest trees and shrubs	moderate mass of light fuels, some woody fuels from secondary forest	green, scorched, & charred	36	45	light, variable, southwest	Lateral spreading fibrous peat, burning at rootmat- hemic peat boundary
1	Q	2015-11-05	9:50-10:53	2o 26’ 46” S, 114o 10’ 12” E	Hemic	hemic with rotten wood fragments, general peat in area, burning under burried log	50	unknown	unknown	consumed, burning under burried log, unable to sample	34	58	light, variable, southwest	Downward spreading in hemic peat - with wood fragments and buried logs/stumps nearby
1	R	2015-11-05	11:03-12:01	2o 26’ 46” S, 114o 10’ 12” E	Hemic & Fibric	fibrous roots $ rotten wood fragments	35	none	very light fern stubble	burning into unburned,dense, packed road peat	34	58	light, variable, southerly	Lateral spreading in compact hemic peat with wood fragments and fibrous fern root intrusions.
1	S	2015-11-05	13:01-14:03	2o 26’ 46” S, 114o 10’ 12” E	Hemic & Fibric	fibrous roots & rotten wood fragments	25	none	none	burning into unburned,dense, packed road peat	35	52	light, variable, southerly ,gusty when hit by thundercell downdraft	Lateral spreading in compact hemic peat with wood fragments and fibrous fern root intrusions.
1	T	2015-11-05	14:07-15:07	2o 26’ 46” S, 114o 10’ 12” E	Hemic & Fibric	fibrous roots & rotten wood fragments	37	none	none	burning into unburned,dense, packed road peat	32	64	light, variable, southerly ,gusty when hit by thundercell downdraft	Lateral spreading in compact hemic peat with wood fragments and fibrous fern root intrusions.
2	U	2015-11-06	10:04-10:23	2o26’25”S, 114o10’34”E	Fibric & Hemic	fibrous roots	20	ferns, foliage from secondary forest trees and shrubs	high mass of light fuels	green, scorched, & charred	33	60	light, variable, southerly	Lateral spreading in loose fibrous peat with fibrous fern root intrusions.
2	V	2015-11-06	10:25-11:30	2o26’25”S, 114o10’34”E	Fibric & Hemic	fibrous roots	30	ferns, foliage from secondary forest trees and shrubs	high mass of light fuels	green, scorched, & charred	33	60	light, variable, southerly ,gusty when hit by thundercell downdraft	Lateral spreading in loose fibrous peat with fibrous fern root intrusions.
2	W	2015-11-06	11:34-12:16	2o26’25”S, 114o10’34”E	Fibric & Hemic	fibrous roots	30	ferns, foliage from secondary forest trees and shrubs	high mass of light fuels	green, scorched, & charred	33	60	light, variable, southerly ,gusty when hit by thundercell downdraft	Lateral spreading in loose fibrous peat with fibrous fern root intrusions.
6	X	2016-11-07	11:02-11:57	1o56'2"S, 113o37'53"E		roots
6	Y	2016-11-07	11:59-12:46	1o56'2"S, 113o37'53"E	"shallow peat"
6	Z	2016-11-07	12:49-13:40	1o56'2"S, 113o37'53"E
6	AA	2016-11-07	13:42-14:32	1o56'2"S, 113o37'53"E

## Sheet: Table S2-All EF
Table S2. Emission factors (g/kg) for each plume measured in the field
Compound (formula); Plume>	CAN 9389	CAN 9387	A	B	C	D	E	F	G	H	CAN-9391	I	J	K	L	CAN 9403	CAN 9404	CAN 7180	CAN 9398	M	N	O	P	Q	R	S	T	CAN 6379	U	V	W	X	Y	Z	AA	Study Avg (35)	Study stdev (35)	Average (stdev) (35 plumes)
Method>	WAS	WAS	WAS+FTIR	WAS+FTIR	FTIR	WAS+FTIR	WAS+FTIR	WAS+FTIR	WAS+FTIR	WAS+FTIR	WAS	WAS+FTIR	WAS+FTIR	WAS+FTIR	WAS+FTIR	WAS	WAS	WAS	WAS	WAS+FTIR	WAS+FTIR	WAS+FTIR	WAS+FTIR	WAS+FTIR	WAS+FTIR	WAS+FTIR	WAS+FTIR	WAS	FTIR	WAS+FTIR	WAS+FTIR	WAS+FTIR	WAS+FTIR	WAS+FTIR	FTIR
Date>	2016-10-31	2016-10-31	2016-11-01	2016-11-01	2016-11-01	2016-11-01	2016-11-02	2016-11-02	2016-11-02	2016-11-02	2016-11-02	2016-11-03	2016-11-03	2016-11-03	2016-11-03	2016-11-03	2016-11-03	2016-11-03	2016-11-03	2016-11-04	2016-11-04	2016-11-04	2016-11-04	2016-11-05	2016-11-05	2016-11-05	2016-11-05	2016-11-05	2016-11-06	2016-11-06	2016-11-06	2016-11-07	2016-11-07	2016-11-07	2016-11-07
MCE	0.803515	0.772829	0.772829	0.743401	0.79858	0.749033	0.82213	0.814899	0.809015	0.798428	0.792628	0.731443	0.732257	0.752022	0.738036	0.754113	0.714024	0.742641	0.825018	0.757554	0.769714	0.758884	0.761214	0.693295	0.761247	0.778628	0.794784	0.765506	0.832341	0.824408	0.834827	0.724248	0.763907	0.775255	0.771045	0.772391	0.0352008	0.772(0.035)
Carbon Dioxide (CO2)	1605.31	1566.66	1574.83	1519.97	1623.89	1522.57	1673.77	1624.07	1647.75	1621.16	1629.31	1486.52	1491.03	1555.35	1498.85	1574.42	1489.12	1556.24	1729.04	1530.67	1575.44	1529.29	1482.81	1357.44	1510.37	1565.21	1519.35	1539.76	1725.9	1642.51	1658.32	1439.25	1551.08	1568.11	1560.99	1564.18	77.1044	1564(77)
Carbon Monoxide (CO)	249.804	293.056	195.331	333.867	260.642	324.636	230.444	234.756	247.536	260.45	271.263	347.321	346.933	326.375	338.553	326.681	379.536	343.195	233.367	311.738	299.947	309.204	296	382.144	301.448	283.185	249.646	300.152	221.232	222.627	208.794	348.716	305.059	289.285	294.969	290.511	48.7295	291(49)
Methane (CH4)	16.5152	12.7935	15.0125	8.32043	16.3157	11.6165	5.76569	8.17909	8.86849	11.3054	9.57331	5.18759	4.17282	4.73703	6.12279	4.78787	5.90851	4.6673	3.65568	9.29968	10.8196	10.7371	10.2482	22.8459	8.75873	7.10796	21.9352	15.5558	6.97922	8.54894	9.57588	9.37877	5.39364	5.21669	6.86714	9.50782	4.74276	9.51(4.74)
Dihydrogen (H2)	1.33847	1.43792	0.915839	0.694949	nm	2.19499	1.17808	1.79724	0.72293	1.97691	1.8139	0.315076	0.776381	0.431728	0.577993	0.34436	2.11462	0.401804	0.242891	1.25072	1.64455	1.64132	0.75222	4.05921	0.249281	0.611692	1.03982	4.62999	nm	1.33905	1.10148	0.582158	0.352723	0.414063	bdl	1.21701	1.00925	1.22(1.01)
Acetylene (C2H2)	0.0289304	0.0669013	0.0899749	0.120166	0.383891	0.195881	0.148812	0.13693	0.15797	0.168212	0.096232	0.129469	0.110843	0.111233	0.104086	0.0291804	0.0345997	0.0212203	0.0190969	0.112064	0.1019	0.115172	0.109196	0.108423	0.130961	0.0889087	0.0977476	0.0752268	0.167989	0.174707	0.193219	0.138478	0.138353	0.157643	0.181464	0.121288	0.0663249	0.121(0.066)
Ethylene (C2H4)	1.77491	1.40993	1.03618	0.685525	3.18303	1.20718	0.860008	0.851153	0.974671	1.31947	0.930194	0.58566	0.455437	0.550739	0.570479	0.475154	0.504666	0.36253	0.404659	0.955248	1.20051	0.859368	1.10287	1.4613	0.737117	0.552138	1.53311	0.755729	0.979657	0.992849	1.51538	0.861233	0.549697	0.652804	0.783591	0.960976	0.527589	0.961(0.528)
Propylene (C3H6)	2.09982	1.51552	1.6204	0.852735	2.90673	1.31945	0.941356	0.901322	1.03318	1.30774	1.0741	0.7505	0.556468	0.667957	0.684804	0.582729	0.605342	0.411903	0.577744	1.02201	1.34521	0.912619	1.40082	1.10212	1.16231	0.797318	2.3189	0.944545	0.958792	0.948721	1.32119	0.746729	0.525101	0.630083	0.790686	1.06677	0.531005	1.07(0.53)
Formaldehyde (HCHO)	nm	nm	0.326411	0.28434	0.814228	0.59748	0.721574	1.26363	1.60789	1.50629	nm	0.544979	0.520693	0.447888	0.589418	nm	nm	nm	nm	0.830005	0.710169	0.673762	0.591383	1.65478	0.54619	0.22888	0.0377195	nm	1.38054	1.52222	1.50561	1.60808	0.96148	0.908924	1.01769	0.86675	0.478809	0.867(0.479)
Methanol (CH3OH)	1.83821	2.00433	2.20641	2.6956	1.71728	2.20317	2.22927	2.37438	2.88812	2.32596	2.47538	1.17395	1.43318	1.45174	1.55556	1.36175	1.22753	0.617556	0.561027	1.31751	1.34637	1.24747	1.79739	2.45367	1.49897	1.32174	2.28239	7.7347	1.9557	2.20116	2.29418	3.03694	2.8949	3.97573	3.03725	2.13533	1.21513	2.14(1.22)
Formic Acid (HCOOH)	nm	nm	0.0980386	0.124751	0.09775	0.0137187	0.209159	0.207312	0.351827	0.205479	nm	0.198528	0.197581	0.167452	0.160313	nm	nm	nm	nm	0.144785	0.112288	0.139307	0.131087	0.14657	0.166284	0.101102	0.0707054	nm	0.187319	0.187907	0.32458	0.221591	0.244703	0.240268	0.409884	0.180011	0.0854662	0.180(0.085)
Acetic Acid (CH3COOH)	nm	nm	2.33858	3.05407	2.07378	4.15564	5.38531	3.03595	5.13928	3.37195	nm	3.90132	3.86681	3.82236	3.8192	nm	nm	nm	nm	2.08695	2.06385	2.40576	5.34704	2.33964	2.20807	1.86185	4.46901	nm	4.56606	2.93825	5.69794	4.36324	5.28609	6.55388	8.85051	3.88898	1.64527	3.89(1.65)
Glycolaldehyde (C2H4O2)	nm	nm	0.0563474	0.016915	bdl	bdl	bdl	bdl	bdl	bdl	nm	bdl	0.10368	0.0897852	bdl	nm	nm	nm	nm	bdl	bdl	0.152045	bdl	bdl	0.28316	0.0521778	bdl	nm	bdl	bdl	bdl	bdl	bdl	bdl	bdl	0.10773	0.0885546	0.108(0.089)
Furan (C4H4O)	0.169733	0.0728974	0.443214	0.482079	0.401218	0.307857	1.15068	0.968429	1.2264	1.09144	0.324303	0.820756	0.765487	0.823946	0.787471	0.180366	0.179201	0.132578	0.175254	0.68609	0.576958	0.709656	0.974633	0.975488	0.892532	0.532009	0.80475	0.585766	1.11147	1.08604	1.18628	1.27172	1.21028	1.30973	1.35764	0.73641	0.391603	0.736(0.392)
Hydroxyacetone (C3H6O2)	nm	nm	1.36147	1.07258	1.4647	1.4658	1.14612	0.816308	0.90309	1.48323	nm	0.945062	0.659546	0.489304	0.255712	nm	nm	nm	nm	0.784347	0.383119	0.520777	0.341963	0.672534	0.759581	0.300828	0.755953	nm	bdl	bdl	0.231486	0.576402	1.26817	1.12097	1.72735	0.860256	0.433067	0.860(0.433)
Phenol (C6H5OH)	nm	nm	0.498937	0.235891	1.04949	0.685438	0.575393	0.601109	0.793005	0.515204	nm	0.27137	0.0924708	0.233182	0.349665	nm	nm	nm	nm	0.233438	0.371014	0.467468	0.377307	0.587479	0.011875	0.214399	0.169135	nm	0.32767	0.334481	0.661735	0.382874	0.378835	0.316294	0.571561	0.418768	0.226456	0.419(0.226)
1,3-Butadiene (C4H6)	0.183409	0.189585	0.268983	0.127791	0.881619	0.0523228	0.239732	0.215495	0.221887	0.32183	0.0890453	0.132198	0.110842	0.15122	0.189327	0.0336979	0.0337183	0.0157364	0.0347099	0.195174	0.387256	0.203411	0.308733	0.204318	0.124061	0.185408	0.410721	0.0474467	0.198637	0.218505	0.291113	0.108146	0.0448615	0.0827675	0.120428	0.189261	0.156771	0.189(0.157)
Isoprene (C5H8)	0.133141	0.136412	0.0427949	bdl	bdl	0.164707	0.0281231	0.0201046	0.0559791	bdl	0.0558178	0.0243522	0.0678738	0.00790676	0.0180927	0.0282113	0.0374991	0.0189418	0.0396087	0.0810749	0.0366754	0.0112946	0.0334622	0.0562354	0.0472461	0.0886227	0.0721297	0.147253	0.0196185	0.011237	0.0646341	0.0980948	0.00671803	0.00252587	0.0334024	0.052806	0.043257	5.28E-2(4.33E-2)
Ammonia (NH3)	nm	nm	2.8415	2.27432	4.00509	4.08234	4.05303	3.81096	3.5102	3.67944	nm	2.2822	1.62068	2.08501	2.85346	nm	nm	nm	nm	3.01062	4.00341	3.38938	2.36904	1.77519	1.59342	1.60333	2.67593	nm	2.78941	4.64928	4.63047	1.64308	1.86996	1.54117	2.70273	2.86462	0.997153	2.86(1.00)
Hydrogen Cyanide (HCN)	nm	nm	2.38226	3.35871	6.05071	5.63406	7.15096	5.84468	6.19946	6.49645	nm	7.20539	6.14742	6.14957	5.69413	nm	nm	nm	nm	4.63347	3.38896	4.12807	6.87949	2.8644	7.28174	3.92033	4.75433	nm	5.64512	6.11737	5.96833	7.09212	7.94477	8.06518	8.21428	5.74858	1.59709	5.75(1.60)
Nitrous Acid (HONO)	nm	nm	0.229473	0.155984	bdl	bdl	0.245487	0.212911	0.22268	0.279199	nm	0.168166	0.14493	0.128602	0.140341	nm	nm	nm	nm	0.131752	0.211949	0.245235	0.193002	0.231228	0.163341	0.118985	0.124639	nm	0.283108	0.270963	0.296675	0.31833	0.214984	0.208124	0.25951	0.207984	0.0589909	0.208(0.059)
Hydrogen chloride (HCl)	nm	nm	bdl	bdl	bdl	bdl	bdl	bdl	bdl	bdl	nm	bdl	bdl	bdl	bdl	nm	nm	nm	nm	0.0494184	0.0368353	bdl	bdl	0.0569503	0.0120934	0.00716066	0.0450623	nm	bdl	bdl	bdl	bdl	bdl	bdl	bdl	0.0345867	0.0204599	3.46E-2(2.05E-2)
Nitric Oxide (NO)	nm	nm	0.251034	0.199547	1.87519	bdl	0.326619	0.226275	0.34183	0.411099	nm	0.193781	0.265397	0.0722201	0.0985648	nm	nm	nm	nm	0.19572	0.116636	0.121625	bdl	bdl	0.354985	0.17032	0.0541654	nm	0.0645376	0.290772	0.254503	0.241706	0.252612	0.316265	0.680719	0.307338	0.36011	0.307(0.360)
Carbonyl sulfide (OCS)	0.0631467	0.0730724	0.0519385	0.0519369	nm	-	0.130422	0.110563	0.134989	0.113772	0.12826	0.13145	0.0971671	0.108679	0.127974	0.119683	0.125548	0.0962619	0.100064	0.0740132	0.12295	0.0661215	0.0947114	0.0841617	0.100072	0.119245	0.0784997	0.149367	nm	0.187419	0.0899224	0.122536	0.198273	0.168669	nm	0.110351	0.0356199	0.110(0.036)
DMS (C2H6S)	0.00245507	0.00266487	0.00363626	0.00142438	nm	0.00015957	0.00437046	0.0103102	0.00247547	0.00661284	0.00754772	0.00081771	0.000938928	0.000876376	0.00168552	0.000780917	0.000565976	0.000299583	0.000488178	0.00161726	-	0.00205627	0.00182513	0.00229344	0.00160631	0.00222301	0.00219051	0.00403684	nm	0.00595702	0.00548507	0.00308795	0.00285852	0.00392827	nm	0.00281534	0.00233881	2.82E-3(2.34E-3)
Chloromethane (CH3Cl)	0.107712	0.114396	0.0973264	0.0999716	nm	0.166395	0.100681	0.15027	0.105817	0.134768	0.176813	0.144282	0.105667	0.123608	0.182836	0.146126	0.146001	0.124327	0.146524	0.0998127	0.315269	0.0840303	0.122332	0.0857346	0.132014	0.167793	0.132937	0.21551	nm	0.334931	0.125483	0.15274	0.157243	0.192656	nm	0.146625	0.0565204	0.147(0.057)
Bromomethane (CH3Br)	0.00878264	0.00867631	0.00644068	0.00582603	nm	0.0108329	0.0071358	0.00940944	0.0109701	0.00726355	0.0110651	0.0114178	0.00877199	0.0087361	0.0148585	0.0128206	0.0144558	0.0100563	0.016934	0.0103522	0.0215444	0.00693703	0.00791327	0.00594194	0.00930618	0.0110063	0.0105657	0.0152795	nm	0.0111732	0.00926214	0.00601117	0.00639304	0.00787696	nm	0.0101255	0.00352357	1.01E-2(3.52E-3)
Methyl iodide (CH3I)	0.0123179	0.0122343	0.00882399	0.00711625	nm	0.00943269	0.00795643	0.0131606	0.00950117	0.0094887	0.0127984	0.0146476	0.0127891	0.0126293	0.020449	0.016775	0.0193216	0.013757	0.0245736	0.0143686	0.0244206	0.00909352	0.0122913	0.00738307	0.00979668	0.0148501	0.0108161	0.0115992	nm	0.00985586	0.0105766	0.00798905	0.00855685	0.0104351	nm	0.0124939	0.00447953	1.25E-2(4.48E-3)
Dibromomethane (CH2Br2)	0.000110967	0.000100941	2.62198e-05	5.67992e-05	nm	0.000108987	7.43993e-05	-	0.000290912	0.000185958	0.000174004	0.000128303	6.52262e-05	9.68118e-05	5.43302e-05	-	4.52465e-06	-	-	-	7.73508e-05	4.67871e-05	-	-	-	-	5.33831e-05	-	nm	-	-	0.000279274	3.47323e-05	0.000118388	nm	0.000104415	7.69712e-05	1.04E-4(7.70E-5)
Ethane (C2H6)	3.82823	2.61483	1.85637	1.83799	nm	1.85159	1.11218	1.61797	1.59295	1.67079	2.15915	0.875459	0.699978	0.951248	1.12392	0.943469	1.02344	0.822052	0.904115	1.35575	1.16445	1.45203	1.95103	1.52702	1.70602	1.77814	2.20062	2.27122	nm	1.27448	1.44426	1.66185	0.683061	0.761829	nm	1.52242	0.655272	1.52(0.66)
Propane (C3H8)	3.40997	1.93794	1.46173	1.41984	nm	1.13383	0.607074	0.908469	0.872155	0.871489	1.10914	0.562616	0.389042	0.592021	0.705575	0.630089	0.56198	0.343821	0.483114	0.786274	0.509484	0.792482	1.24579	0.519184	1.57335	1.42492	1.43097	2.21883	nm	0.736285	0.839815	0.793624	0.378508	0.392309	nm	0.988804	0.643519	0.989(0.644)
i-Butane (C4H10)	0.252998	0.138203	0.111249	0.0998367	nm	0.0832036	0.0462791	0.0750752	0.0463171	0.0685316	0.0874582	0.028881	0.0132061	0.0330396	0.0450471	0.0341305	-	-	-	0.0403461	-	0.062636	0.0890677	0.036377	0.114208	0.105647	0.114263	0.540482	nm	0.0733019	0.0692577	0.036019	0.015591	-	nm	0.0911353	0.102204	9.11E-2(1.02E-1)
n-Butane (C4H10)	0.985579	0.704869	0.447627	0.422263	nm	0.334879	0.220559	0.331476	0.279755	0.288034	0.417622	0.185454	0.146024	0.230937	0.262562	0.22522	0.150222	0.0642744	0.0770302	0.248633	0.107759	0.230123	0.40362	0.140144	0.458856	0.447296	0.467201	0.993378	nm	0.265028	0.299815	0.208468	0.117354	0.109526	nm	0.320987	0.22515	0.321(0.225)
1-Butene (C4H8)	0.465763	0.460162	0.168872	0.135973	nm	0.202963	0.162194	0.194675	0.174818	0.209839	0.227179	0.121199	0.0920432	0.128284	0.166559	0.133505	0.132964	0.0881076	0.135638	0.197167	0.191398	0.167902	0.259386	0.144415	0.166568	0.221953	0.175708	0.208498	nm	0.158742	0.172404	0.171868	0.0731435	0.10044	nm	0.181573	0.085082	0.182(0.085)
i-Butene (C4H8)	0.793212	0.626003	0.322613	0.253005	nm	0.357267	0.205607	0.240282	0.213269	0.231107	0.254613	0.208745	0.143152	0.18207	0.2664	0.228674	0.193933	0.133559	0.149893	0.409427	0.655748	0.359077	0.505784	0.18066	0.395764	0.443987	0.371869	0.477288	nm	0.242691	0.200598	0.303079	0.168318	0.222263	nm	0.310624	0.160134	0.311(0.160)
trans-2-Butene (C4H8)	0.237742	0.1524	0.0951383	0.0710634	nm	0.0773864	0.0651358	0.0955269	0.0921037	0.0903564	0.107981	0.0443771	0.0364898	0.0506207	0.0684478	0.0492392	0.0494324	0.0301207	0.0555484	0.0680755	0.0815524	0.0645141	0.0921038	0.0603456	0.0785222	0.0651245	0.0894016	0.0778187	nm	0.0813885	0.0827126	0.0806191	0.0394078	0.0498551	nm	0.0775172	0.0379587	7.75E-2(3.80E-2)
cis-2-Butene (C4H8)	0.210682	0.123586	0.072768	0.0571065	nm	0.0709375	0.0463033	0.0706498	0.0701956	0.0702257	0.081209	0.0348522	0.0287416	0.0377934	0.050036	0.0383172	0.0405243	0.0252509	0.0404122	0.0550933	0.0640769	0.0536478	0.0737519	0.0488601	0.0636376	0.0570944	0.0705449	0.0656201	nm	0.0572236	0.0602509	0.0604937	0.0306521	0.0375186	nm	0.0615018	0.0333614	6.15E-2(3.34E-2)
i-Pentane (C5H12)	0.228852	0.145577	0.103215	0.0778231	nm	-	0.0380833	0.134186	0.406489	0.0568549	0.0591794	0.0276067	0.18322	0.0322898	0.0365169	0.0466924	0.00619706	0.0461552	-	0.299976	-	0.0320534	0.0776944	0.00799007	0.0753456	0.0685664	0.0904701	0.545245	nm	0.332169	0.0445483	-	-	-	nm	0.123192	0.134679	0.123(0.135)
n-Pentane (C5H12)	0.683486	0.465825	0.300632	0.280023	nm	0.164349	0.155354	0.237841	0.304148	0.191736	0.258284	0.129507	0.199613	0.144941	0.181222	0.149983	0.130608	0.100428	0.107714	0.268361	-	0.154546	0.283793	0.0851063	0.29019	0.283146	0.313507	0.480516	nm	0.269294	0.190452	-	-	-	nm	0.243022	0.130627	0.243(0.131)
1,2-Propadiene (C3H4)	0.00125844	0.00185877	0.000689678	0.000594025	nm	0.0124754	0.00093964	0.00199004	0.00478905	0.00205205	0.00163708	0.000908739	0.000689	0.000777994	0.000956504	0.00105883	0.00093852	0.00135234	0.00115431	0.00173819	-	0.0010783	0.00135264	0.0049747	0.000405334	0.00114684	0.000820215	0.000400497	nm	0.00213761	0.00106782	0.00386798	0.000638866	0.00137781	nm	0.00184281	0.00227254	1.84E-3(2.27E-3)
Propyne (C3H4)	0.0023139	0.00396304	0.00142533	0.00160607	nm	0.0421987	0.00313737	0.00492085	-	0.00677603	0.00547157	0.00218371	0.00179557	0.0017615	0.00227822	0.00255668	0.00250272	-	-	0.0050987	-	0.00260104	0.00309174	0.0218484	4.50372e-05	0.00298178	0.00148094	0.000700869	nm	0.00759005	0.00327019	0.0173256	0.00182064	0.00541903	nm	0.00564876	0.00857294	5.65E-3(8.57E-3)
1-Butyne (C4H6)	-	-	-	-	nm	-	-	-	-	-	-	-	-	-	-	-	-	-	-	-	-	-	-	0.00381193	-	-	-	-	nm	-	-	0.00161513	0.00198073	0.000519965	nm	0.00198194	0.00136879	1.98E-3(1.37E-3)
2-Butyne (C4H6)	-	-	-	-	nm	-	-	-	-	-	-	-	-	-	-	-	-	-	-	-	-	0.000236075	0.000284597	0.00399345	-	-	-	-	nm	-	-	0.00173897	0.000190914	0.000454054	nm	0.00114968	0.00151132	1.15E-3(1.51E-3)
1,3-Butadyne (C4H2)	-	0.000160482	-	-	nm	-	-	0.000288064	-	0.000226746	-	-	-	-	-	-	0.000780831	-	-	-	-	-	-	-	-	-	-	-	nm	-	-	0.000195565	-	0.000142161	nm	0.000298975	0.000241655	2.99E-4(2.42E-4)
1,2-Butadiene (C4H6)	-	0.000662873	-	0.000126235	nm	-	-	0.000348289	-	0.000548304	0.000444996	-	-	-	0.000246527	-	-	-	-	-	-	0.00026558	-	0.00245048	-	-	-	-	nm	0.000627367	-	0.00111973	0.000170456	0.000366166	nm	0.00061475	0.000638675	6.15E-4(6.39E-4)
1-Pentene (C5H10)	0.323453	0.342365	0.111328	0.0945818	nm	0.0977537	0.0946041	0.113388	0.103946	0.118196	0.134719	0.0752666	0.0594974	0.0828645	0.106255	0.0429215	0.0739256	0.048921	0.0764117	0.127584	0.128979	0.110073	0.173208	0.0622486	0.111707	0.14062	0.112264	0.110938	nm	0.0748878	0.0935335	0.0780216	0.0372567	0.0528681	nm	0.109831	0.066003	0.110(0.066)
trans-2-Pentene (C5H10)	0.149434	0.114838	0.0592341	0.0415625	nm	0.037079	0.0297085	0.0473278	0.0402373	0.0421863	0.0487336	0.0193033	0.0239744	0.0244097	0.0326483	0.0223987	0.0219039	0.0100322	0.0194703	0.0327581	0.0384857	0.0362063	0.052888	0.0258879	0.0476153	0.0357323	0.052204	0.0478454	nm	0.0276016	0.0345007	0.0283064	0.0106258	0.0163694	nm	0.0397346	0.0275903	3.97E-2(2.76E-2)
cis-2-Pentene (C5H10)	0.0847358	0.0603042	0.0313761	0.023761	nm	0.0233026	0.0189011	0.0253482	0.0285014	0.0241893	0.0272323	0.0105587	0.013047	0.0129885	0.0177625	0.0120017	0.0120471	0.00698871	0.0112046	0.0195737	0.0239235	0.0199332	0.0284427	0.014003	0.0248325	0.0201747	0.0287939	0.0262887	nm	0.0151294	0.0191584	0.0161034	0.0059936	0.00883983	nm	0.0223576	0.0151898	2.24E-2(1.52E-2)
3-Methyl-1-butene (C5H10)	0.103957	0.0837548	0.0334801	0.0276698	nm	0.0263803	0.0205342	0.0327558	0.026266	0.0348341	0.0281362	0.018833	0.0129009	0.0187698	0.0260273	0.022896	0.0191659	0.0107085	0.0198377	0.0263687	0.0239235	0.028988	0.0439708	0.0130616	0.059598	0.045669	0.0318249	0.0359279	nm	0.0215282	0.0241038	0.0233155	0.0109883	0.0149451	nm	0.0303475	0.0198045	3.03E-2(1.98E-2)
2-Methyl-1-butene (C5H10)	0.0843095	0.073687	0.0304908	0.0223939	nm	0.0320961	0.0211026	0.0327431	0.0419139	0.0315415	0.016924	0.0177263	0.0204659	0.0177549	0.0251902	0.0193022	0.0176144	0.0107085	0.0159803	0.0309325	0.0509675	0.0294726	0.0412342	0.0175332	0.0304297	0.0349293	0.0293523	0.0464434	nm	0.0271136	0.0218453	0.0313438	0.0139099	0.0203573	nm	0.0299315	0.0160842	2.99E-2(1.61E-2)
2-Methyl-2-butene (C5H10)	0.20429	0.166711	0.081033	0.0608274	nm	0.0593557	0.0375948	0.0692974	0.0514144	0.060389	0.063369	0.0380616	0.0434901	0.0396337	0.0575492	0.0862724	0.0388794	0.0238969	0.0347159	0.0627778	0.0998547	0.0663803	0.0871729	0.0305948	0.0788333	0.052695	0.0729819	0.081495	nm	0.0448459	0.0464163	0.0591953	0.029663	0.0401353	nm	0.064682	0.0371937	6.47E-2(3.72E-2)
2-Methyl-1-Pentene (C6H12)	0.368506	0.39109	0.105329	0.0875655	nm	0.102361	0.0916935	0.104518	0.091209	0.124286	0.128575	0.0701798	0.0537695	0.0761311	0.0991459	0.079473	0.0752434	0.0481568	0.0864081	0.11331	0.133562	0.106198	0.166199	0.0650994	0.0958343	0.13334	0.101509	0.0969573	nm	0.0685898	0.0839271	0.0771556	0.0277787	0.046558	nm	0.109364	0.0764557	0.109(0.076)
1,3-Pentadiene (C5H8)	0.0496604	0.0510824	0.0153892	0.0107077	nm	0.0333115	0.016136	0.02211	-	0.0269123	0.0250321	0.0119954	0.0109692	0.0142885	0.0193528	0.0137654	0.01445	0.0091972	0.0198043	0.0232487	-	0.017095	0.0257458	0.022517	0.0141662	0.0233012	0.0162311	-	nm	0.0184882	0.0184958	0.0159668	0.00478711	0.0103019	nm	0.0198107	0.0104385	1.98E-2(1.04E-2)
1,3-Cyclopentadiene (C5H6)	0.019456	0.018882	0.00677288	0.00492739	nm	0.0211347	0.00572858	0.00844443	0.0152754	0.0143179	0.0111117	0.00625551	0.00416799	0.00561855	0.00896624	0.00696619	0.0075699	0.00424975	0.0148889	0.00946343	0.0235292	0.00920756	0.0114768	0.0150838	0.00349225	0.00113524	0.00398444	0.00412967	nm	0.0135444	0.0083681	0.0182805	0.00415356	0.00864508	nm	0.00997587	0.005849	9.98E-3(5.85E-3)
Cyclopentene (C5H8)	0.0728062	0.083747	0.02729	0.0208606	nm	0.0226314	0.0218635	0.0290461	0.0227957	0.0303423	0.0340125	0.0162966	0.0127777	0.0181917	0.0248637	0.0189438	0.0165752	0.00996217	0.0180175	0.0243287	0.031316	0.0229138	0.0356865	0.0116569	0.0212844	0.0147195	0.0212639	0.023489	nm	0.0172215	0.0228044	0.0180372	0.00793728	0.0119326	nm	0.0245505	0.0156591	2.46E-2(1.57E-2)
1-Heptene (C7H14)	0.260683	0.279743	0.0877065	0.0679177	nm	0.0644253	0.0648141	0.0671395	0.0751082	0.0768691	0.0833031	0.0538587	0.0457916	0.0585256	0.0674413	0.0567981	0.0553244	0.0347174	0.0740591	0.0841956	0.0873711	0.0747907	0.11653	0.0622709	0.078138	0.10328	0.0724699	0.0736068	nm	0.0472201	0.0586033	0.0504648	0.0199562	0.025522	nm	0.0790201	0.0540237	7.90E-2(5.40E-2)
1-Octene (C8H16)	0.206807	0.221554	0.0644952	0.0545773	nm	0.054183	0.0522088	0.0489517	0.0554539	0.0593434	0.0711936	0.0428563	0.031819	0.0464893	0.0619474	0.0491963	0.0452809	0.0326534	0.0605589	0.0671985	0.094889	0.0673355	0.0931586	0.0580054	0.05665	0.0705211	0.061785	0.0748916	nm	0.0396622	0.0466788	0.0486011	0.0181663	0.0276877	nm	0.06515	0.0424493	6.52E-2(4.24E-2)
1-Decene (C10H20)	0.17544	0.193784	0.0479897	0.042092	nm	0.0527606	0.0402457	0.0314801	0.0368842	0.0654402	0.0570033	0.0395766	0.0312837	0.0393639	0.0518415	0.0426277	0.0432601	0.0252495	0.0584109	0.0462467	0.00624092	0.0549407	0.0856662	0.0388318	0.0389437	0.0558066	0.0488939	0.021031	nm	0.0265713	0.0347343	0.0310293	0.0106258	0.0191799	nm	0.0497961	0.0388242	4.98E-2(3.88E-2)
n-Hexane (C6H14)	0.470216	0.336983	0.212211	0.193366	nm	0.131832	0.0980913	0.134437	0.13941	0.114947	0.159926	0.0876493	0.137066	0.0992241	0.12124	0.0986565	0.0984706	0.0732763	0.117826	0.111418	0.0843614	0.104955	0.191953	0.0876293	0.200822	0.18304	0.207255	0.24035	nm	0.0913603	0.109867	0.0577552	0.0302651	0.0350274	nm	0.142528	0.0871687	0.143(0.087)
n-Heptane (C7H16)	0.399997	0.295439	0.175343	0.155909	nm	0.100521	0.0794992	0.0955699	0.1102	0.0885899	0.125862	0.0716688	0.0614127	0.0808469	0.0994366	0.0807416	0.0772038	0.0595956	0.0992123	0.0895594	0.0951228	0.086287	0.143939	0.045567	0.160296	0.148299	0.165431	0.130223	nm	0.0661732	0.0854659	0.0464033	0.0277331	0.0362525	nm	0.111994	0.0737939	0.112(0.074)
n-Octane (C8H18)	0.366087	0.277411	0.0275102	0.0302815	nm	0.089519	0.0662904	0.0839729	0.0992201	0.0817869	0.11036	0.0655094	0.0547656	0.0770285	0.095052	0.0758023	0.0718014	0.0508583	0.0921496	0.0867264	0.106737	0.0872664	0.14765	0.115959	0.14741	0.137984	0.155772	0.103624	nm	0.0584725	0.0735747	0.0419327	0.0240608	0.0329575	nm	0.0979854	0.069009	9.80E-2(6.90E-2)
n-Nonane (C9H20)	0.310514	0.232559	0.129362	0.112937	nm	0.0696571	0.0369027	0.0574293	0.071512	0.0610446	0.0827936	0.0433024	0.0348069	0.064866	0.0863096	0.0614391	0.0457135	0.0292602	0.0725278	0.0760123	0.0988746	0.0743925	0.146933	0.19704	0.122926	0.118897	0.135965	0.111171	nm	0.043716	0.0550247	0.0319325	0.0215979	0.0274417	nm	0.0895269	0.0633003	8.95E-2(6.33E-2)
n-Decane (C10H22)	0.264266	0.216227	0.110852	0.0968688	nm	0.0642291	0.0505836	0.0440892	0.0600957	0.0446378	0.0751143	0.0519876	0.0403379	0.0582582	0.0693298	0.0552137	0.0522191	0.029503	0.0633558	0.063172	0.061202	0.0647664	0.102378	0.0816527	0.107006	0.101417	0.114739	0.0824966	nm	0.0381784	0.046614	0.0278813	0.0173263	0.0245819	nm	0.0743931	0.0509035	7.44E-2(5.09E-2)
2,3-Dimethylbutane (C6H14)	0.0146153	0.010026	0.00864037	0.00699884	nm	0.00359934	0.0020716	0.00895156	0.00617624	0.00408912	0.00335347	0.00200936	0.00569944	0.00201931	0.000448569	0.00149875	0.000560357	-	-	0.00410974	bdl	0.00252133	0.00434222	0.00260095	0.00629228	0.00505335	0.00460338	0.0178624	nm	0.00779091	0.00224738	-	-	-	nm	0.00531468	0.0041484	5.31E-3(4.15E-3)
2-Methylpentane (C6H14)	0.175035	0.107898	0.0885497	0.0752021	nm	0.0248354	0.020394	0.0539013	0.0260775	0.0345048	0.0355421	0.0260379	0.0484677	0.0285859	0.0265964	0.0228698	0.0135606	0.00692087	0.0112777	0.023164	0.00766362	0.0288935	0.0388912	0.0125712	0.0666014	0.0441244	0.0424588	0.080919	nm	0.0303646	0.0154448	0.00800177	0.00547651	-	nm	0.0397043	0.0358239	3.97E-2(3.58E-2)
3-Methylpentane (C6H14)	0.0267875	0.0178155	0.0115487	0.00868944	nm	0.0021596	0.00288539	0.012598	0.0171562	0.00668502	0.00680141	0.00236407	0.0166047	0.00320251	0.00431748	0.0042187	0.00123278	0.000276835	-	0.00709865	-	0.00432227	0.00891098	0.00375692	0.0102613	0.00850442	0.0107739	0.0355097	nm	0.0112535	0.00559455	-	-	-	nm	0.00930852	0.00800499	9.31E-3(8.00E-3)
Benzene (C6H6)	2.11711	1.47924	1.05715	1.12561	nm	1.31131	0.928832	0.851247	0.859004	0.895363	1.18229	0.702643	0.601438	0.645035	0.804108	0.755703	0.834588	0.608803	0.541756	0.998816	0.951174	0.946727	1.01949	0.945911	1.05316	0.932275	1.19265	2.15724	nm	0.603758	0.874388	0.729792	0.374611	0.447643	nm	0.954027	0.394035	0.954(0.394)
Toluene (C7H8)	0.626528	0.50544	0.306192	0.209673	nm	0.342361	0.271524	0.506738	0.333347	0.563037	0.444535	0.203165	0.210743	0.235888	0.301023	0.231003	0.224591	0.159354	0.216714	0.284218	0.196791	0.275045	0.59197	1.8523	0.254069	0.315571	0.315327	0.686411	nm	0.297025	0.296631	0.241064	0.11848	0.227106	nm	0.370121	0.305588	0.370(0.306)
Ethylbenzene (C8H10)	0.107033	0.0926242	0.0465244	0.0319773	nm	0.0430423	0.0330946	0.0434284	0.0532995	0.0450023	0.0580249	0.0232912	0.022573	0.0291733	0.0400469	0.0277154	0.0248695	0.0158699	0.0253043	0.0376156	0.0330676	0.0418951	0.0581868	0.0607455	0.0373542	0.0490793	0.0538536	0.0652677	nm	0.0310309	0.0368434	0.0287435	0.0135232	0.024709	nm	0.0417128	0.0201924	4.17E-2(2.02E-2)
m/p-Xylene (C8H10)	0.276027	0.253276	0.118478	0.0887028	nm	0.118699	0.0844892	0.113845	0.116751	0.117136	0.128423	0.0877908	0.0837083	0.089601	0.126339	0.0985435	0.0888395	0.0508519	0.0909285	0.113154	0.151166	0.12362	0.183265	0.259905	0.106812	0.131283	0.138136	0.17617	nm	0.0681367	0.0880705	0.097017	0.0515568	0.0798624	nm	0.121893	0.0549682	0.122(0.055)
o-Xylene (C8H10)	0.302489	0.290574	0.107077	0.0824501	nm	0.0876376	0.0815542	0.0842678	0.0972927	0.0951873	0.122368	0.068284	0.058369	0.0752866	0.106085	0.0763028	0.0733651	0.0506813	0.088982	0.0844431	0.118099	0.105916	0.147562	0.158188	0.094042	0.114417	0.117186	0.147781	nm	0.0543452	0.079287	0.0596443	0.0272405	0.0444878	nm	0.103153	0.0588697	0.103(0.059)
Styrene (C8H8)	0.0480148	0.051267	0.0161184	0.0115385	nm	0.0528895	0.0215066	0.0218304	0.0290483	0.0291444	0.0405569	0.018413	0.0149256	0.0242881	0.0255201	0.021449	0.0147738	0.01289	0.0223684	0.028617	-	0.0266861	0.0316459	0.0581934	0.0103026	0.0250424	0.0226839	0.0512743	nm	0.0216633	0.0283943	0.0240443	0.0120913	0.0218847	nm	0.0270667	0.0130549	2.71E-2(1.31E-2)
i-Propylbenzene (C9H12)	0.0168061	0.0167639	0.00981305	0.00722724	nm	0.00427007	0.00394851	0.00620487	bdl	0.0058034	0.00721846	0.00329815	0.00250543	0.00405141	0.00313035	0.00317646	0.00218986	bdl	-	0.00365018	bdl	0.00406546	0.00463757	0.00665529	0.00486397	0.00533275	0.00437444	0.00690851	nm	0.00306697	0.00266952	0.00347427	0.00159841	0.00188769	nm	0.00534258	0.00374408	5.34E-3(3.74E-3)
n-Propylbenzene (C9H12)	0.0354998	0.0389988	0.0198232	0.0157415	nm	0.00627952	0.00975779	0.0126649	bdl	0.0117671	0.0183922	0.0099056	0.00651412	0.0125726	0.00853021	0.00914199	0.00563107	bdl	-	0.00782181	bdl	0.00824021	0.00874814	0.0131089	0.0104035	0.0116976	0.00909064	0.0126155	nm	0.00613395	0.0052723	0.00612297	0.00371196	0.00496333	nm	0.0117554	0.00820274	1.18E-2(8.20E-3)
3-Ethyltoluene (C9H12)	0.0931642	0.105107	0.0536368	0.0374562	nm	0.0150709	0.0209123	0.0346837	0.0210716	0.0306522	0.0413001	0.0183319	0.0157216	0.0247048	0.0156778	0.0167732	0.0100108	0.00019319	0.00692577	0.01912	bdl	0.0218136	0.0227662	0.0494105	0.0216177	0.0247715	0.0202318	0.0369455	nm	0.0126397	0.0106113	0.0160413	0.00748452	0.0109193	nm	0.0269602	0.0228483	2.70E-2(2.28E-2)
4-Ethyltoluene (C9H12)	0.0898152	0.0977776	0.0441981	0.0298165	nm	0.0118055	0.0133209	0.022175	0.0124514	0.0221234	0.0286101	0.0155323	0.0116503	0.0172185	0.0143996	0.0123184	0.0101672	bdl	-	0.0189462	bdl	0.0164149	0.0188665	0.0350915	0.0263465	0.021159	0.014422	0.0273337	nm	0.0128255	0.00867594	0.0132664	0.00578005	0.00909673	nm	0.0235036	0.0212986	2.35E-2(2.13E-2)
2-Ethyltoluene (C9H12)	0.149793	0.149121	0.0775192	0.0614645	nm	0.0221039	0.0369253	0.044165	0.0210716	0.0428682	0.0637466	0.030231	0.0224236	0.0359342	0.0299209	0.0273485	0.0187702	0.00251147	-	0.0279847	-	0.0357149	0.0377329	0.0550574	0.0401278	0.0414578	0.042104	0.0423522	nm	0.018216	0.0212227	0.0212011	0.0116965	0.0168428	nm	0.0415877	0.0334744	4.16E-2(3.35E-2)
1,3,5-Trimethylbenzene (C9H12)	0.0369612	0.035106	0.0184044	0.013778	nm	0.0052748	0.00683985	0.010792	bdl	0.00897763	0.0123604	0.00712026	0.00651412	0.00753033	0.00613027	0.00464847	0.0050054	bdl	-	0.00782181	bdl	0.00843693	0.00837924	0.0244027	0.00837684	0.00946133	0.00786033	0.0174215	nm	0.00483281	0.00433797	0.00763651	0.00325743	0.00475178	nm	0.0108007	0.00855487	1.08E-2(8.55E-3)
1,2,4-Trimethylbenzene (C9H12)	0.170618	0.195415	0.0921008	0.0710184	nm	0.0256204	0.0388127	0.0548047	0.0335231	-	0.0724812	-	-	-	-	0.0388147	0.0240885	bdl	0.0182589	-	-	-	-	-	-	-	-	0.0687848	nm	-	-	-	-	-	nm	0.0695647	0.0552335	6.96E-2(5.52E-2)
1,2,3-Trimethylbenzene (C9H12)	0.144922	0.166166	0.0806128	0.0691043	nm	0.0190897	0.0384131	0.0523779	0.0287341	-	0.0785461	-	-	-	-	0.0479955	0.0261219	bdl	0.0223514	-	-	-	-	-	-	-	-	0.0558688	nm	-	-	-	-	-	nm	0.0638695	0.0456816	6.39E-2(4.57E-2)
alpha-Pinene (C10H16)	-	0.00810935	-	-	nm	0.00341646	0.00279361	0.00511331	0.00217127	0.00646893	0.00560403	0.00146024	0.0016329	0.000648889	0.000502655	0.00114159	0.00265943	bdl	-	-	bdl	0.000768012	0.0010752	0.00457185	0.00199086	0.000194984	-	0.0115756	nm	0.00231754	0.00105903	-	-	0.000405794	nm	0.00298553	0.00288185	2.99E-3(2.88E-3)
beta-Pinene (C10H16)	-	-	-	-	nm	bdl	0.000864066	0.00126617	-	0.00254396	0.00138233	0.00074767	0.00106493	0.000424274	0.000295679	0.000570797	bdl	bdl	bdl	-	-	bdl	0.00101547	0.00342889		bdl	bdl	0.00646874	nm	bdl	bdl	-	-	-	nm	0.00167275	0.00176003	1.67E-3(1.76E-3)
2-Methylfuran (C5H6O)	0.0594361	0.0443179	0.0505815	0.0514066	nm	0.150297	0.0749952	0.0907257	0.100753	0.120543	0.145083	0.0699316	0.0372222	0.0510609	0.0876672	0.0728707	0.053315	0.0316706	0.0571989	0.0641134	0.0681906	0.104704	0.0667027	0.253886	0.0151354	0.0749671	0.0418323	0.572839	nm	0.403878	0.13489	0.385765	0.142428	0.203327	nm	0.121304	0.122754	0.121(0.123)
Nitromethane (CH3NO2)	0.131765	0.147383	0.0431404	0.0319938	nm	0.0790879	0.0455345	0.0642328	0.11674	0.0722641	0.0688144	0.0323527	0.040875	0.0372025	0.0504608	0.0373582	0.0437695	0.0314935	0.0604323	0.0646156	0.112261	0.0470868	0.0748301	0.0842917	0.0338273	0.0525044	0.0423482	0.0813047	nm	0.0476233	0.0483647	0.0541896	0.015127	0.0289746	nm	0.0600703	0.0309826	6.01E-2(3.10E-2)
Acetaldehyde (C2H4O)	0.748509	0.416802	0.217069	0.341322	nm	0.688667	0.75889	0.562509	0.711529	0.679865	0.718332	0.447859	0.416091	0.322985	0.603269	0.283241	0.348657	0.421628	0.19279	0.428146	0.774862	0.468471	0.70434	2.21552	0.430647	0.452476	0.609639	1.86282	nm	1.37072	0.620497	1.27402	0.855321	1.36396	nm	0.697233	0.460359	0.697(0.460)
Butanal (C4H8O)	0.0500847	0.0405786	0.00565853	0.0139183	nm	0.0263523	0.0211204	0.0146687	0.0660339	0.0215862	0.0194639	0.0176596	0.0125419	0.00855375	0.011995	0.00506266	0.000375096	-	-	0.0161518	0.0577117	0.0114132	0.0183876	0.0762914	0.0139319	0.0212447	0.0168824	0.0567232	nm	0.021674	0.00840206	0.0286443	0.0126481	0.0183411	nm	0.0238034	0.0190654	2.38E-2(1.91E-2)
Furfural (C5H4O2)	0.109185	0.0959111	-	-	nm	0.122178	0.0616652	0.0743146	0.148411	0.0765452	0.173148	0.0388759	0.0669372	0.0676196	0.0434625	0.0234214	0.0879528	0.0211394	0.0467678	0.0653889	0.0441394	0.0489687	0.0719346	0.275769	0.071439	0.088209	0.108257	0.526599	nm	0.165832	0.0866727	0.377161	0.356813	0.161612	nm	0.123544	0.11614	0.124(0.116)
Acetone (C3H6O)	0.932682	0.839347	0.48047	0.720442	nm	0.0301011	0.726515	0.669352	-	0.677589	0.953413	0.619702	0.846351	0.501292	0.475689	0.679859	0.537556	0.606794	0.347445	0.47254	1.54368	0.382688	0.715681	1.34554	0.347658	0.42901	0.390494	1.68963	nm	0.930484	0.256541	0.787223	0.546826	0.926551	nm	0.690617	0.355814	0.691(0.356)
Butanone (C4H8O)	0.160914	0.15319	0.0836376	0.0888713	nm	0.103602	0.116403	0.099763	0.308924	0.11981	0.159426	0.0998958	0.0929	0.0787789	0.120294	0.129028	0.123875	0.0802622	0.0620919	0.085448	0.26184	0.101841	0.181854	0.192482	0.0345058	0.082813	0.08769	0.308826	nm	0.152944	0.0900221	0.246717	0.135841	0.206386	nm	0.135965	0.0682933	0.136(0.068)
Methyl vinyl ketone (C4H6O)	0.0571306	0.0678314	0.0245586	0.0115221	nm	0.078848	0.0281626	0.0446007	0.101523	0.0624432	0.0763626	0.0288236	0.0460725	0.0331485	0.0445898	0.0228084	0.0574822	0.0475927	0.0181508	0.0311789	0.0550259	0.0365847	0.0486772	0.162909	0.00464254	0.0145269	0.0300144	0.18228	nm	0.0716096	0.0483514	0.163046	0.0483982	0.0713458	nm	0.0568825	0.0427469	5.69E-2(4.27E-2)
Note: "bdl" indicates below the detection limit; "-" indicates concentrations were not greater than background; "nm" indicates not measured

## Sheet: Table S3-Comparisons
Table S3. Comparison of Emission Factors (g/kg) and MCE From Selected Studies of Peat Combustion.
Compound (formula)	Kalimantan peat (this study) Avg (stdev)	Sumatran peat Christian et al. [2003]; Akagi et al. [2011]	Kalimantan peat Stockwell et al. [ 2015] Fire 114a	Kalimantan peat Stockwell et al. [2015] Fire 125b	Kalimantan peat Huijnen et al. (2016)	Kalimantan peat Hamada et al. (2013)	Kalimantan lab avg/mean (this study)
Location>	Field	Laboratory	Laboratory	Laboratory	Field	Field
MCE	0.772(0.035)	0.837484	0.743894	0.871515	0.862(0.024)	0.724
Carbon Dioxide (CO2)	1564(77)	1703	1329.38	1685.04	1594(61)		0.963691
Carbon Monoxide (CO)	291(49)	210.3	291.249	158.086	255(39)		0.772052
Methane (CH4)	9.51(4.74)	20.8	17.8504	5.54149	7.4(2.3)		1.22986
Acetylene (C2H2)	0.121(0.066)	0.06	0.205084	0.123572			1.35808
Ethylene (C2H4)	0.961(0.528)	2.57	1.52508	0.661478			1.13765
Propylene (C3H6)	1.07(0.53)	3.05	1.89426	0.761553			1.24103
Formaldehyde (HCHO)	0.867(0.479)	1.4	2.00608	1.05843			1.76731
Methanol (CH3OH)	2.14(1.22)	8.46	3.07397	4.49309			1.768
Formic Acid (HCOOH)	0.180(0.085)	0.38	0.491289	0.567752			2.94178
Acetic Acid (CH3COOH)	3.89(1.65)	8.97	4.81125	9.91489			1.89282
Glycolaldehyde (C2H4O2)	0.108(0.089)	3.42	bdl	bdl
Furan (C4H4O)	0.736(0.392)	1.91	1.01973	0.979118			1.35792
Hydroxyacetone (C3H6O2)	0.860(0.433)	2.21	0.319985	0.517485			0.486901
Phenol (C6H5OH)	0.419(0.226)	3.62	0.700084	0.596425			1.54715
1,3-Butadiene (C4H6)	0.189(0.157)	nm	0.349104	0.199738			1.45196
Isoprene (C5H8)c	5.28E-2(4.33E-2)	1.38	1.39607	0.880231			21.5559
Ammonia (NH3)	2.86(1.00)	19.92	1.97122	0.686289			0.4646
Hydrogen Cyanide (HCN)	5.75(1.60)	8.11	3.82721	3.29531			0.61935
Nitric Oxide (NO)	0.307(0.360)	1	bdl	1.40911			4.58994
1-Butene (C4H8)	0.182(0.085)	nm	1.42604	0.666853			5.74971
1,3-Butadiyne (C4H2)	2.99E-4(2.42E-4)	nm	bdl	0.00372896			12.4714
1,3-Cyclopentadiene (C5H6)	9.98E-3(5.85E-3)	nm	0.083912	0.0477023			6.5939
Benzene (C6H6)	0.954(0.394)	3.19	1.0053	0.536535			0.80809
Toluene (C7H8)	0.370(0.306)	1.55	0.729252	0.452744			1.59729
Styrene (C8H8)	2.71E-2(1.31E-2)	nm	0.143085	0.0799892			4.11576
alpha-Pinene (C10H16)	2.99E-3(2.88E-3)	nm	0.078	0.049			21.2375
2-Methylfuran (C5H6O)	0.121(0.123)	nm	0.35168	0.482318			3.44627
Acetaldehyde (C2H4O)	0.697(0.460)	3.27	1.36833	1.62317			2.14598
Furfural (C5H4O2)	0.124(0.116)	nm	1.80238	2.63658			17.8991
Acetone (C3H6O)	0.691(0.356)	1.25	1.36658	1.39792			2.00036
Butanone (C4H8O)	0.136(0.068)	nm	0.548646	0.747025			4.76349
Methyl vinyl ketone (C4H6O)	5.69E-2(4.27E-2)	nm	0.271495	0.222631			4.34206
a-sample taken from undisturbed peat forest
b-sample taken from previously logged/burned peat forest
c-Compounds in blue could have large impact of isomers, ratios in red fail factor-of-two test (see text), shaded ratios fail without isomer impact.

## Sheet: Fig. S1-site photos
																Fig S1. Clockwise: a) profile of an undercut formed by a lateral spreading peat fire (3-Nov); b) landscape with multiple peat smoke sources. Note the residual green leaves on trees, an indication that a low intensity surface fire initiated the smoldering peat fire (2-Nov); c) measuring depth (48.2 cm) at the edge of a lateral spreading fire (3-Nov); d) downward spreading peat fire next to canal w…
